# Supplementary material for: Deciphering the regulatory mechanism of electrocatalytic activity in an Fe-anchored CuInP 2 S 6 monolayer via ferroelectric switching and in-plane strain
Source: Royal Society of Chemistry journal article supplement (doi:10.1039/d5cp03837e), 2025-01-01
Supplement: d5cp03837e1.pdf [file d5cp03837e1.pdf]

## Supplementary Information

### **Deciphering the regulatory mechanism of electrocatalytic activity in Fe- anchored $\text{CuInP}_2\text{S}_6$ monolayer via ferroelectric switching and in-plane strain**

Wenjing Jiang, Jiahui Tang, Dazhi Sun\*, Baozeng Zhou\*

*Tianjin Key Laboratory of Film Electronic & Communicate Devices, School of Integrated Circuit  
Science and Engineering, Tianjin University of Technology, Tianjin 300384, China*

\*Corresponding Authors

[34713301@qq.com](mailto:34713301@qq.com) (D. Sun)

[baozeng@tju.edu.cn](mailto:baozeng@tju.edu.cn) (B. Zhou)

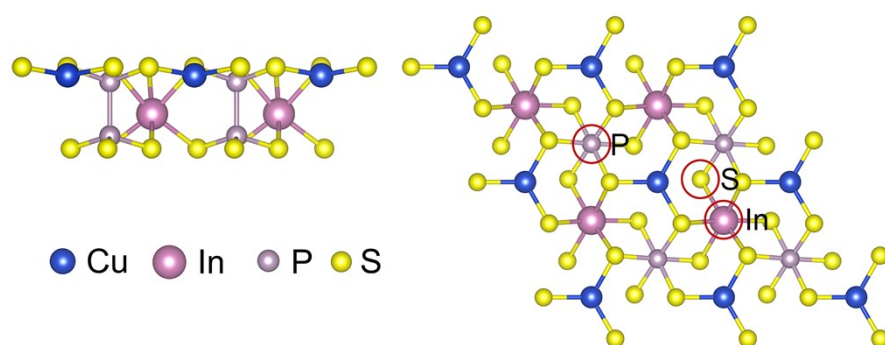

**Fig. S1** Schematic diagram of different adsorption sites on the surface of CIPS substrate.

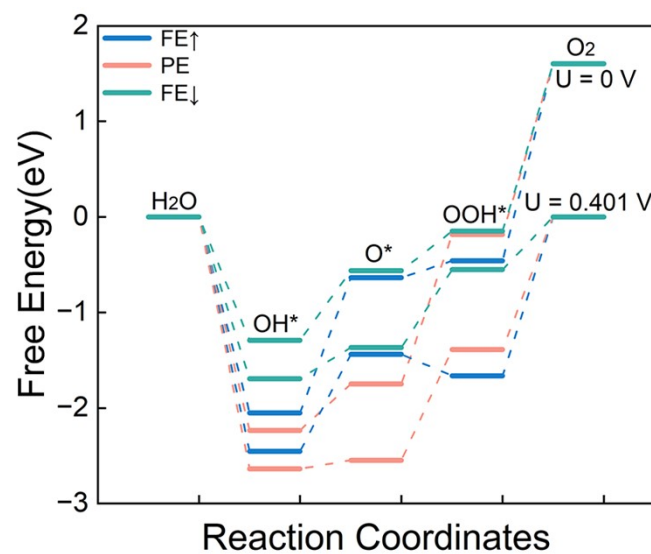

**Fig. S2** Gibbs free energy changes for individual reaction steps of the OER process in three configurations under alkaline conditions (pH = 14)

**Table. S1** Total energy ( $E_{\text{tot-H}^*}$ ), adsorption energy ( $E_{\text{ads}}$ ), the Gibbs free energy ( $\Delta G_{\text{H}^*}$ ) of  $\text{H}^*$ 

|                 | $E_{\text{total-H}^*}(\text{eV})$ | $\Delta G_{\text{H}^*}(\text{eV})$ | $E_{\text{ads}}(\text{eV})$ |
|-----------------|-----------------------------------|------------------------------------|-----------------------------|
| FE $\uparrow$   | -195.730                          | -0.508                             | -3.28                       |
| PE              | -196.145                          | -0.861                             | -3.15                       |
| FE $\downarrow$ | -194.365                          | -1.068                             | -2.57                       |

**Table. S2** The energy consumptions of each reaction step and overpotential in different polarization states

|                 | $\Delta G_1$ | $\Delta G_2$ | $\Delta G_3$ | $\Delta G_4$ | Overpotential (eV) |
|-----------------|--------------|--------------|--------------|--------------|--------------------|
| FE $\uparrow$   | -1.223       | 2.245        | 1.007        | 2.891        | 1.661              |
| PE              | -1.405       | 1.315        | 2.393        | 2.617        | 1.387              |
| FE $\downarrow$ | -0.464       | 1.559        | 1.242        | 2.583        | 1.353              |

**Table. S3** Total energy ( $E_{\text{tot-H}^*}$ ), adsorption energy ( $E_{\text{ads}}$ ), the Gibbs free energy ( $\Delta G_{\text{H}^*}$ ) of  $\text{H}^*$  on the Cu adsorption site under  $-14\%$  strain

|    | $E_{\text{total-H}^*}(\text{eV})$ | $\Delta G_{\text{H}^*}(\text{eV})$ | $E_{\text{ads}}(\text{eV})$ |
|----|-----------------------------------|------------------------------------|-----------------------------|
| Cu | -166.835                          | 0.414                              | -3.27                       |

**Table. S4** The energy consumption of each reaction step and the overpotential with Cu as the adsorption site under  $-14\%$  strain

|    | $\Delta G_1$ | $\Delta G_2$ | $\Delta G_3$ | $\Delta G_4$ | Overpotential (eV) |
|----|--------------|--------------|--------------|--------------|--------------------|
| Cu | -1.223       | 2.245        | 1.007        | 2.891        | 1.661              |

**Table. S5** Total energy ( $E_{\text{tot-H}^*}$ ), adsorption energy ( $E_{\text{ads}}$ ), the Gibbs free energy ( $\Delta G_{\text{H}^*}$ ) of  $\text{H}^*$  on the Fe adsorption site under  $-14\%$  strain

|    | $E_{\text{total-H}^*}(\text{eV})$ | $\Delta G_{\text{H}^*}(\text{eV})$ | $E_{\text{ads}}(\text{eV})$ |
|----|-----------------------------------|------------------------------------|-----------------------------|
| Fe | -172.979                          | -0.616                             | -4.151                      |

**Table. S6** The energy consumption of each reaction step and the overpotential with Fe as the adsorption site under  $-14\%$  strain

|    | $\Delta G_1$ | $\Delta G_2$ | $\Delta G_3$ | $\Delta G_4$ | Overpotential (eV) |
|----|--------------|--------------|--------------|--------------|--------------------|
| Fe | -1.327       | 0.944        | 3.362        | 1.941        | 2.132              |
